# Supplementary material
Source: PubMed Central journal article supplement (PMC2673277)
Supplement: M807637200_2.pdf [file M807637200_2.pdf]

## Real-time PCR Primer sequences for the analysis of 14-3-3 isoform expression

| <b>14-3-3 Isoform</b> | <b>Forward Primer Sequence (5'-3')</b> | <b>Reverse Primer Sequence (5'-3')</b> |
|-----------------------|----------------------------------------|----------------------------------------|
| <b>ζ</b>              | GCA ACG ATG TACT GT CTC                | CTG GTC CAC AAT TCC TTT C              |
| <b>β</b>              | GCA ACG ATG TGC TGG AGC                | GAG TTG GAC ACC GTG GTT TG             |
| <b>η</b>              | CGA GTC GCG AGC GAC ATG                | CCC TCC AAG AAG ATC GCC TG             |
| <b>γ</b>              | GCC ATG AAG AAC GTG ACC                | GCC ATG AAG AAC GTG ACC                |
| <b>ε</b>              | TAC GAC GAA ATG GTG GAA TC             | GCT CAG TTT CAA CCA TTT GC             |
| <b>σ</b>              | AGC AGA AGA CCG ACA CCT CC             | CCG TGG TGC AGA TGG ATC                |
| <b>τ</b>              | TCG CCA TGG AGA AGA CCG                | CCG ATA GTC CTT GAT CAG C              |
| <b>β-Actin</b>        | TGG AAT CCT GTG GCA TCC ATG<br>AAA C   | TAA AAC GCA GCT CAG TAA CAG<br>TCC G   |
